# Supplementary material
Source: HighWire-hosted journal article supplement (http://thorax.bmj.com/highwire/filestream/174076/field_highwire_adjunct_files/0/Figure_E1.pdf)

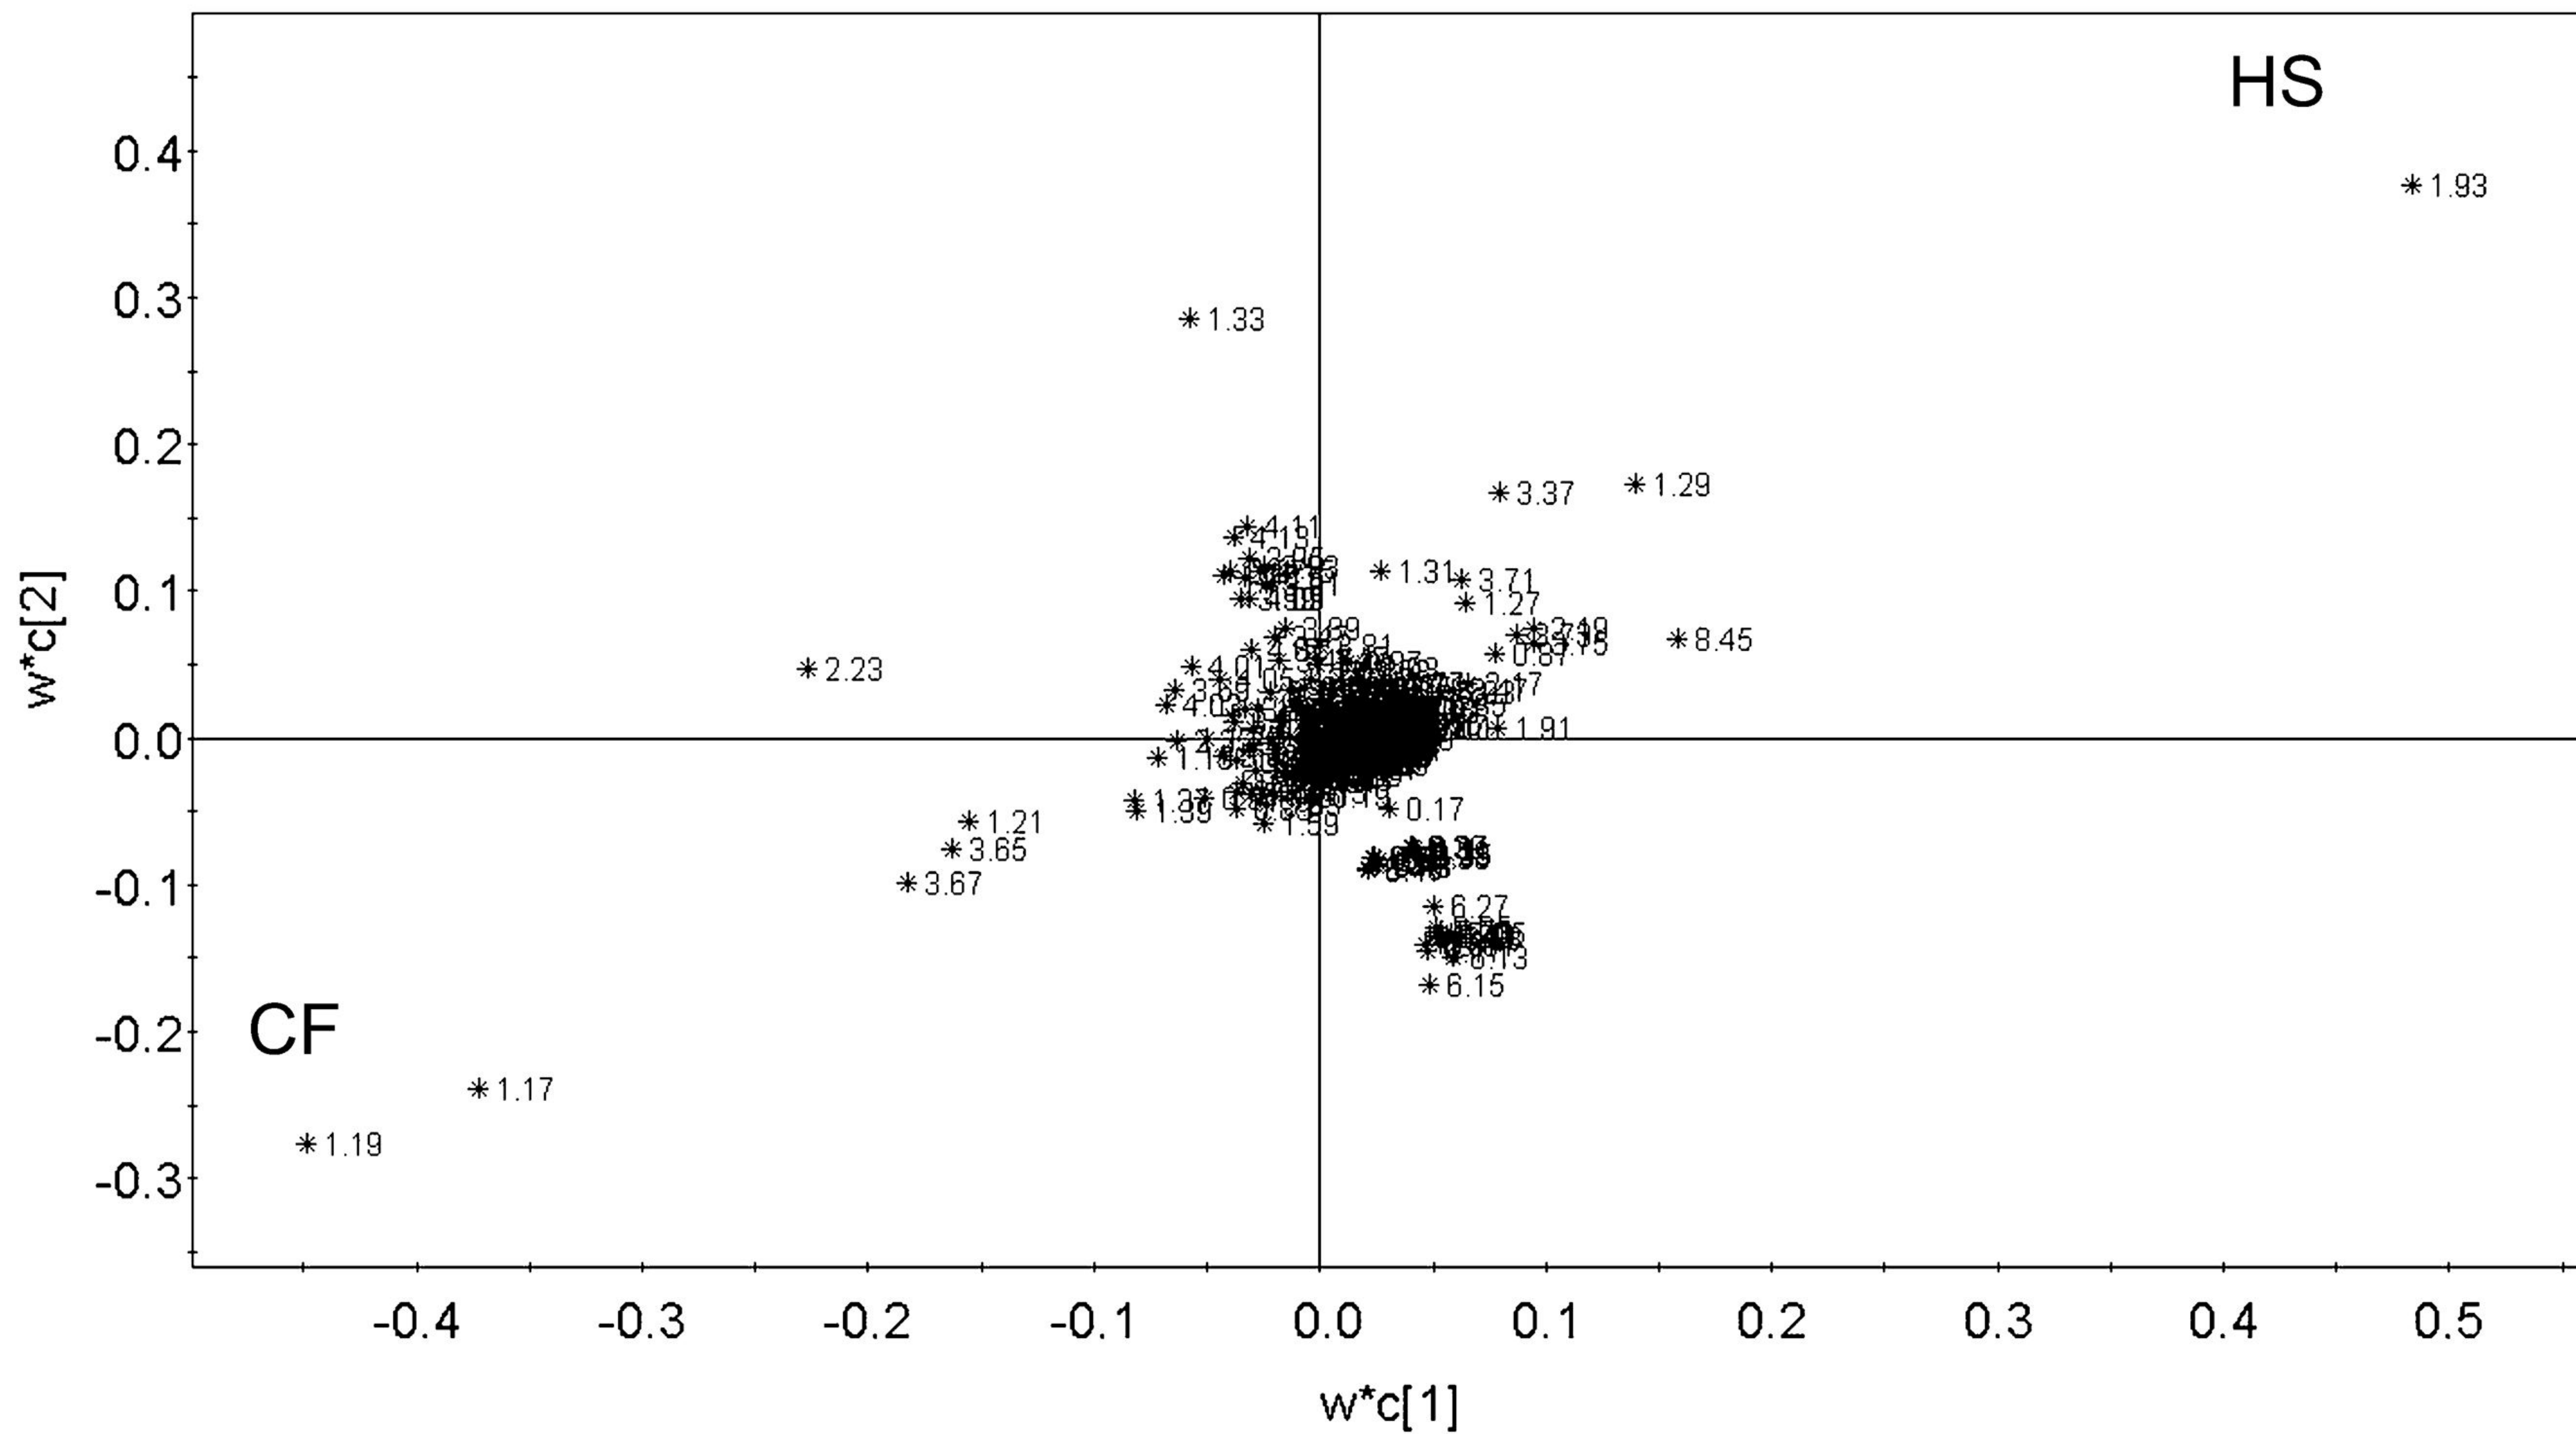

Supplement: Figure_E1.pdf [file Figure_E1.pdf]
